# Supplementary material for: Nanocomposite based on restacked crystallites of β-NiS and Ppy for the determination of theophylline and uric acid on screen-printed electrodes
Source: Royal Society of Chemistry journal article supplement (doi:10.1039/c9nj04246f), 2019-01-01
Supplement: c9nj04246f1.pdf [file c9nj04246f1.pdf]

## Supplementary Information

Restacked crystallites of  $\beta$ -NiS and Ppy based nanocomposite for determination of theophylline and uric acid on screen printed electrode

P.Muthukumar<sup>a</sup> R. Ramya<sup>a</sup> P. Thivya<sup>a</sup> J.Wilson<sup>a\*</sup> and G.Ravi<sup>b</sup>

<sup>a</sup>*Polymer Electronics Lab, Department of Bioelectronics and Biosensors, Alagappa University Karaikudi-630004, Tamilnadu, India.*

<sup>b</sup>*Photonic Crystals Lab, Department of Physics, Alagappa University, Karaikudi-630004, Tamilnadu, India.*

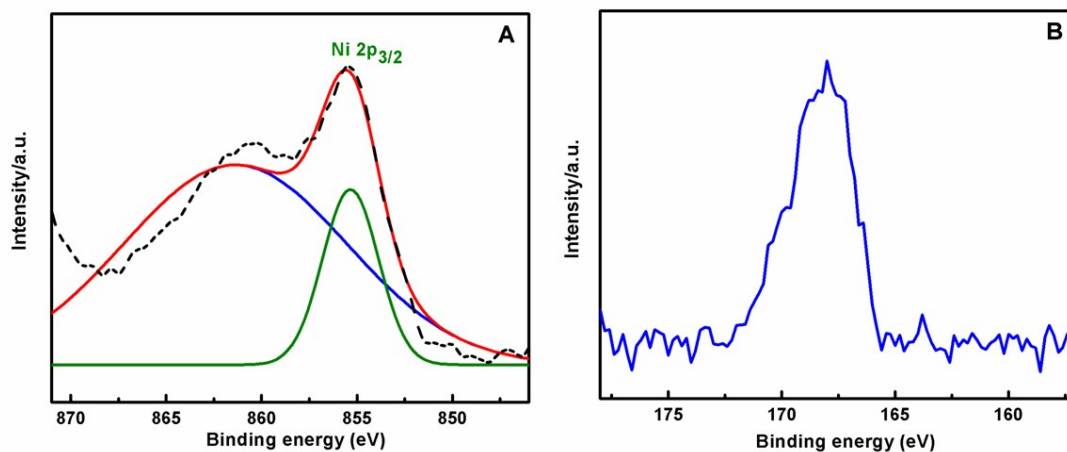

Fig. S1 (A) Ni 2p<sub>3/2</sub> and (B) S2p of calcinated  $\beta$ -NiS sample.

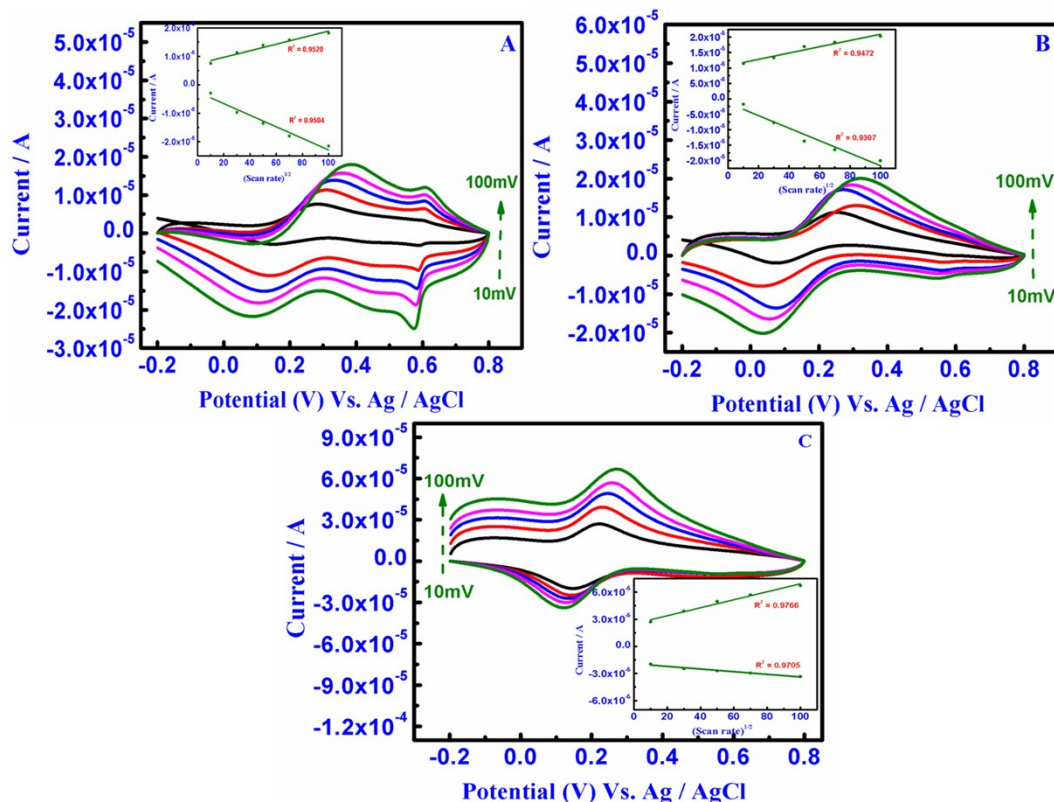

**Fig. S2.** CV behavior (A)  $\beta$ -NiS (B) Ppy (C)  $\beta$ -NiS/Ppy/SPE nanocomposite for different scan rate (10-100  $\text{mVs}^{-1}$ ) by preparing stock solution in presence of 1mM each  $[\text{Fe}(\text{CN})_6]^{3-}$  (Ferricyanide) and  $[\text{Fe}(\text{CN})_6]^{4-}$  (Ferrocyanide) with 0.1 M of KCl in 100 ml of deionized water.

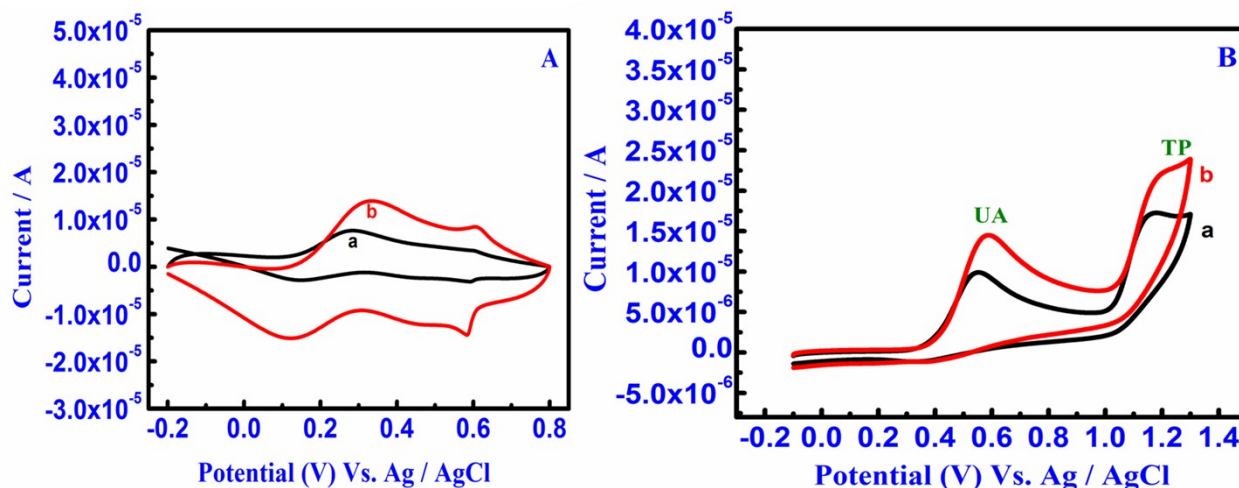

**Fig. S3** (A) CV curve (a) uncalcinated  $\beta$ -NiS, (b) calcinated  $\beta$ -NiS in 50  $\text{mVs}^{-1}$  by preparing stock solution in presence of 1mM each  $[\text{Fe}(\text{CN})_6]^{3-}$  (Ferricyanide) and  $[\text{Fe}(\text{CN})_6]^{4-}$  (Ferrocyanide) with 0.1 M of KCl in 100 ml of deionized water. (B) CV curve (a) uncalcinated  $\beta$ -NiS, (b) calcinated  $\beta$ -NiS in presence of 500  $\mu\text{M}$  TP and UA at pH 6.0 PBS

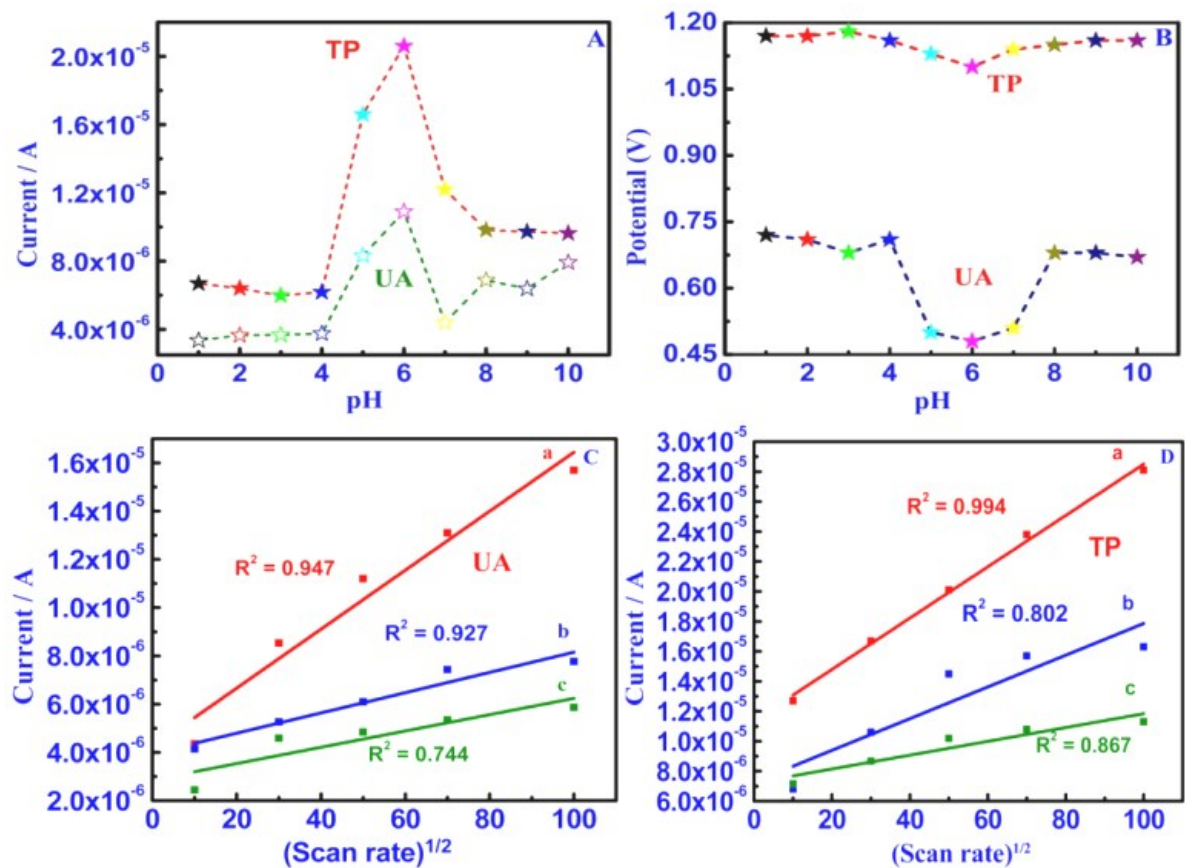

Fig. S4 Plot of from pH (1-10) for pH vs current, (B) pH vs. potential for  $\beta$ -NiS/Ppy/SPE modified electrode TP and UA in 500  $\mu$ M. (C) and (D)  $i_{pa}$  vs  $(\text{scan rate})^{1/2}$  (a)  $\beta$ -NiS/Ppy (b) Ppy (c) calcinated  $\beta$ -NiS modified electrode in 500  $\mu$ M UA and TP at pH 6.0.

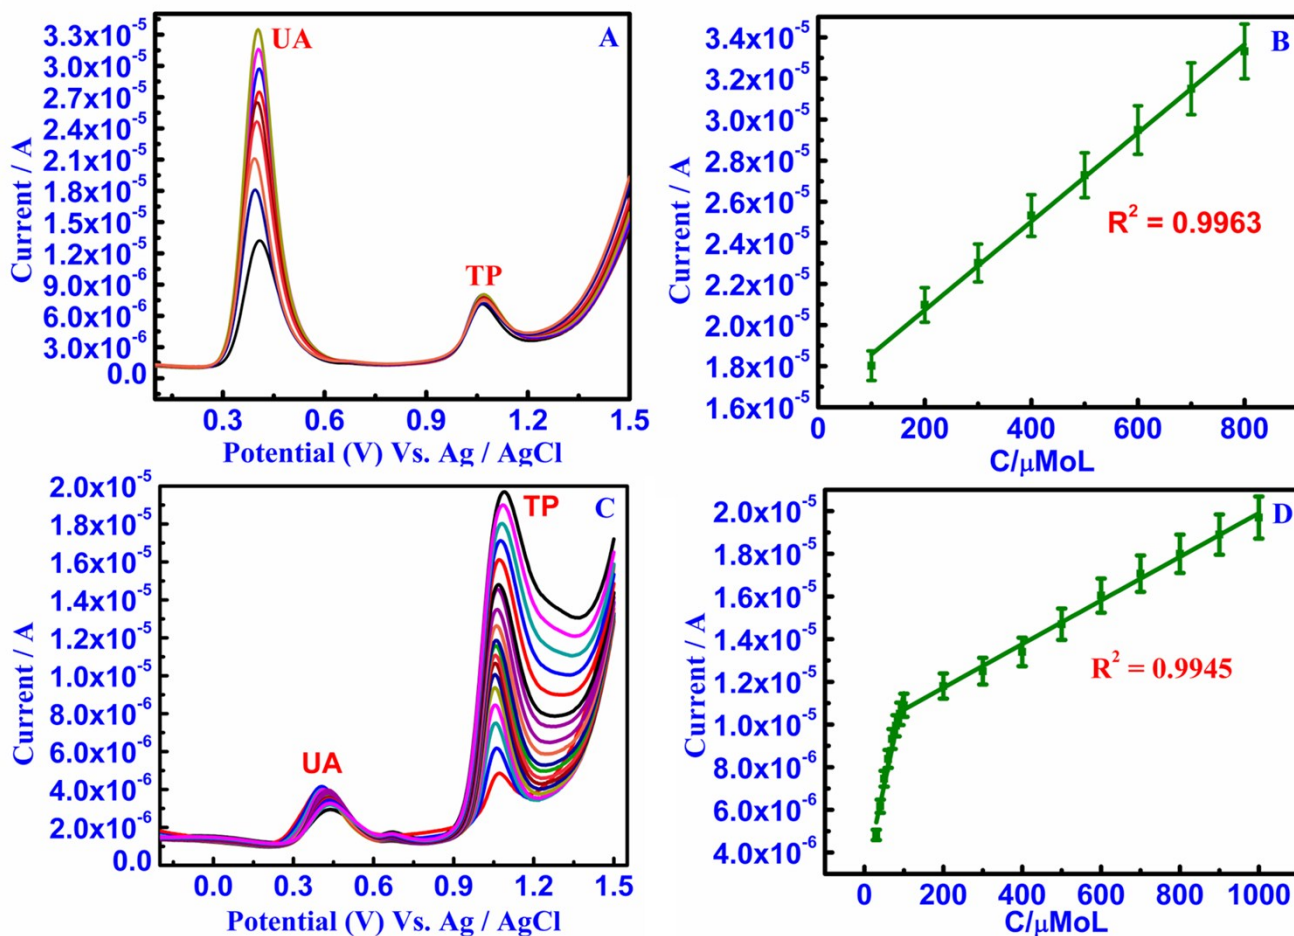

Fig. S5 SWV(A) and (C) Selectivity test for UA and TP on  $\beta$ -NiS/Ppy/SPE by varying the concentration in 0.1M PBS at (pH 6.0) and (B) and (D) Calibration plot of the oxidation peak current against different concentrations of TP and UA.

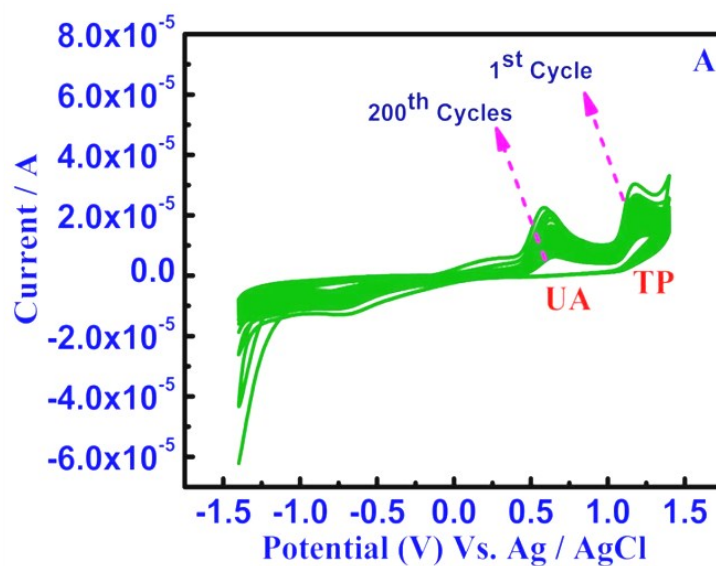

**Fig. S6 Stability studies (A) simultaneous behavior of UA and TP on  $\beta$ -NiS/Ppy/SPE for consecutive 200 cycles at scan rate  $50\text{mVs}^{-1}$  presence of  $500\mu\text{M}$  analyte in  $0.1\text{M}$  PBS at (pH 6.0).**

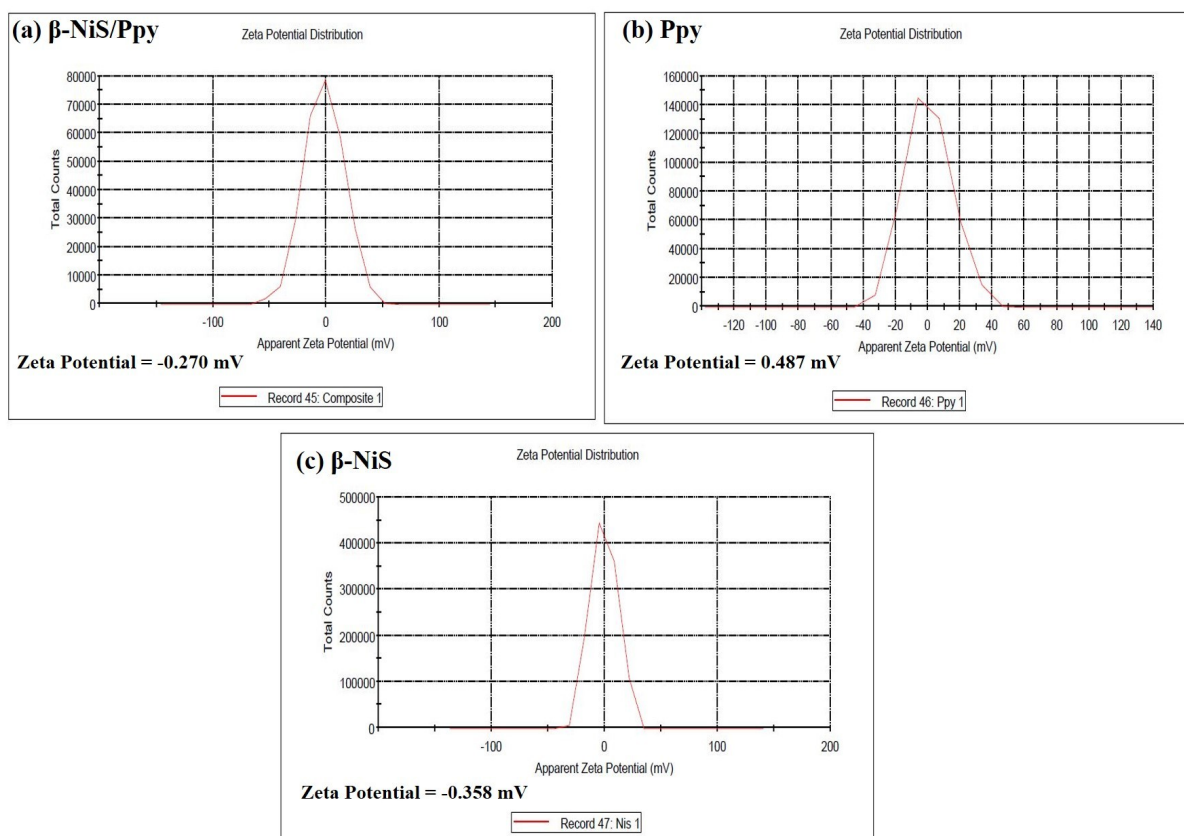

**Fig. S7 Zeta potential analysis of (a)  $\beta$ -NiS/Ppy, (b) Ppy and (c)  $\beta$ -NiS samples,**

***Table S1: Comparison table performances for TP with other reported literature***

| <i>S.No.</i> | <i>Materials</i>                                                            | <i>Linear range</i>                         | <i>Limit of detection</i> | <i>Ref</i> |
|--------------|-----------------------------------------------------------------------------|---------------------------------------------|---------------------------|------------|
| 1.           | <i>Graphene nanosheet/GCE</i>                                               | $5.0 \times 10^{-8} - 4.0 \times 10^{-5} M$ | $2.9 \times 10^{-9}$      | [1]        |
| 2.           | <i>Urchin-like CdSe microparticle/GCE</i>                                   | $1.0 \times 10^{-6} - 7.0 \times 10^{-4} M$ | $4.0 \times 10^{-7}$      | [2]        |
| 3.           | <i>Carbon paste electrode/CTAB</i>                                          | $8.0 \times 10^{-7} - 2.0 \times 10^{-4} M$ | $1.8 \times 10^{-7}$      | [3]        |
| 4.           | <i>Xanthine oxidase electrode</i>                                           | $2.0 \times 10^{-7} - 5.0 \times 10^{-5} M$ | $2.0 \times 10^{-7}$      | [4]        |
| 5.           | <i>MWCNT/GCE</i>                                                            | $3.0 \times 10^{-7} - 1.0 \times 10^{-5} M$ | $5.0 \times 10^{-8}$      | [5]        |
| 6.           | <i>Nafion:lead-ruthenium oxide pyrochlore chemically modified electrode</i> | $2.0 \times 10^{-5} - 1.0 \times 10^{-4} M$ | $1.0 \times 10^{-7}$      | [6]        |
| 7.           | <i>AT-AuNPs/GCE</i>                                                         | $4.0 \times 10^{-8} - 1.0 \times 10^{-4} M$ | $8.0 \times 10^{-9}$      | [7]        |

*Table S2 Summarized table for TP and UA determination simultaneously compared with literature*

| <i>Modified active electrode</i>      | <i>Linear range (TP and UA)</i>                                                                                                      | <i>Limit of detection</i>                                                                  | <i>Ref</i>       |
|---------------------------------------|--------------------------------------------------------------------------------------------------------------------------------------|--------------------------------------------------------------------------------------------|------------------|
| <i>CdS/PTA/Nafion/GCE</i>             | <i>TP (<math>1 \times 10^{-6} - 2 \times 10^{-4}</math>) M</i><br><i>UA (<math>5 \times 10^{-6} - 1 \times 10^{-3}</math>) M</i>     | <i>TP (<math>6 \times 10^{-7}</math>) M</i><br><i>UA (<math>2 \times 10^{-6}</math>) M</i> | [44]             |
| <i><math>\beta</math>-NiS/Ppy/SPE</i> | <i>UA (<math>10 \times 10^{-9} - 900 \times 10^{-6}</math>) M</i><br><i>TP (<math>20 \times 10^{-9} - 1 \times 10^{-3}</math>) M</i> | <i>UA (<math>1 \times 10^{-9}</math>)</i><br><i>TP (<math>5 \times 10^{-9}</math>) M</i>   | <i>This work</i> |

**Table S3 Voltammetric signal for UA,TP recovery tests performed in fresh human urine, serum and fresh tea leaves with  $\beta$ -NiS/Ppy, pH=6.0**

| <b>Samples</b>     | <b>Added<br/>[UA, TP]<br/><math>\mu</math>M</b> | <b>Obtained<br/>[UA, TP]<br/><math>\mu</math>M</b> | <b>Recovery (%)<br/>[UA, TP]</b> |
|--------------------|-------------------------------------------------|----------------------------------------------------|----------------------------------|
| <b>Tea leaves</b>  | <b>– , 4.00</b>                                 | <b>– , 4.10</b>                                    | <b>– , 102.5</b>                 |
| <b>Human urine</b> | <b>7.25 , 50.00</b>                             | <b>7.50 , 50.31</b>                                | <b>97.06 , 99.38</b>             |
| <b>Blood serum</b> | <b>6.06, 1.00</b>                               | <b>6.00 , 1.05</b>                                 | <b>101.0, 105.3</b>              |

### References:

- 1 M.A. Raj and S.A. John, *Analytical Methods*, 2014, **6**, 2181- 2188.
- 2 H. Yin, X. Meng, H. Su, M. Xu and S. Ai, *Food Chemistry*, 2012, **134**, 1225 - 1230.
- 3 R.N. Hegde, R.R. Hosamani and S.T. Nandibewoor, *Analytical Letters*, 2009, **42**, 2665 - 2682.
- 4 M. Stredansky, A. Pizzariello, S.Miertus and J. Svorc, *Analytical Biochemistry*, 2000, **285**, 225 -229.
- 5 Y.H. Zhu, Z.L. Zhang and D.W. Pang , *Journal of Electroanalytical chemistry*, 2005, **581**,303 - 309.
- 6 J.M. Zen, T. Yu and Y. Shih, *Talanta*,1999, **50**, 635 - 640.
- 7 S. Kesavan and S.Abraham John, *Sensors and Actuators B*, 2014, **205**, 352 - 362.
